# Supplementary material for: Exploring the polymorphism and origins of accessory chromosomes in Tremella fuciformis: insights into genome divergence and structural variation
Source: Research Square preprint supplement (doi:10.21203/rs.3.rs-6846850/v1), 2025-07-10
Supplement: Supplementary file 1 [file e3c162a34ee215785c961824.pdf]

1 Supplementary Table 1. Source information of *T. fuciformis* strains.

| Strain ID | Source Location                                                   | Type       | Morphotype | Nuclear Status | Associated<br><i>A. stygium</i> |
|-----------|-------------------------------------------------------------------|------------|------------|----------------|---------------------------------|
| TF2206    | Tongjiang County, Bazhong,<br>Sichuan, China                      | Wild       | M/Y        | Heterokaryon   | +                               |
| 4-1       | Tongjiang, Bazhong, Sichuan,<br>China                             | Wild       | M/Y        | Heterokaryon   | +                               |
| QC        | Tongjiang, Bazhong, Sichuan,<br>China                             | Wild       | M/Y        | Heterokaryon   | +                               |
| TF103     | Tongjiang, Bazhong, Sichuan,<br>China                             | Wild       | M/Y        | Heterokaryon   | +                               |
| TF104     | Tongjiang, Bazhong, Sichuan,<br>China                             | Wild       | M/Y        | Haploid        | +                               |
| NDB       | Mangdang Mountain,<br>Nanping, Fujian, China                      | Wild       | M/Y        | Heterokaryon   | +                               |
| QS        | Qishan National Forest Park,<br>Fuzhou, Fujian, China             | Wild       | M/Y        | Heterokaryon   | +                               |
| Wuyi2015  | Wuyishan Biosphere Reserve,<br>Nanping, Fujian, China             | Wild       | Y          | Haploid        | -                               |
| Wuyi2014  | Wuyishan Biosphere Reserve,<br>Nanping, Fujian, China             | Wild       | Y          | Haploid        | -                               |
| Tr01      | Gutian County, Ningde,<br>Fujian, China                           | Cultivated | M/Y        | Heterokaryon   | +                               |
| Tr21      | Gutian County, Ningde,<br>Fujian, China                           | Cultivated | M/Y        | Heterokaryon   | +                               |
| GD        | Shaoguan, Guangdong, China                                        | Wild       | M/Y        | Heterokaryon   | +                               |
| B-1       | Tengchong, Yunnan, China                                          | Wild       | M/Y        | Heterokaryon   | +                               |
| C-1       | Tengchong, Yunnan, China                                          | Wild       | M/Y        | Heterokaryon   | +                               |
| LYS2020   | Liangyeshan Mountain,<br>Wuping County, Longyan,<br>Fujian, China | Wild       | Y          | Haploid        | -                               |
| T0053     | Wuping Longyan, Fujian,<br>China                                  | Wild       | Y          | Haploid        | -                               |

2 Note: M/Y indicates that the strain exhibits both mycelial (M) and yeast-like/ (Y) morphological states;  
3 “+” indicates presence of an associated *A. stygium* strain; “-” indicates absence.

4  
5  
6  
7  
8  
9  
10  
11  
12

13      Supplementary Table 2. *T. fuciformis* genome assembly statistics using Hi-C.

| Strain ID | HiFi reads number | Total data (Gb) | Contig N50 (Kb) | Coverage (×) |
|-----------|-------------------|-----------------|-----------------|--------------|
| TF2206    | 540,905           | 10.58           | 19.71           | 441          |
| 4-1       | 361,242           | 6.76            | 18.78           | 273          |
| QC        | 247,810           | 5.42            | 22.15           | 222          |
| TF103     | 332,323           | 6.34            | 19.58           | 259          |
| TF104     | 321,258           | 6.89            | 21.97           | 282          |
| NDB       | 329,762           | 7.27            | 22.06           | 232          |
| QS        | 393,337           | 8.87            | 22.49           | 265          |
| Wuyi2015  | 180,615           | 3.37            | 18.44           | 103          |
| Wuyi2014  | 406,556           | 4.07            | 12.25           | 131          |
| Tr01      | 211,688           | 3.34            | 21.17           | 120          |
| Tr21      | 575,272           | 9.52            | 16.96           | 142          |
| GD        | 389,229           | 9.21            | 23.57           | 321          |
| B-1       | 365,840           | 7.87            | 21.6            | 286          |
| C-1       | 280,680           | 5.97            | 21.31           | 221          |
| LYS2020   | 286,678           | 4.47            | 15.67           | 159          |
| T0053     | 224,771           | 3.96            | 17.27           | 139          |

14

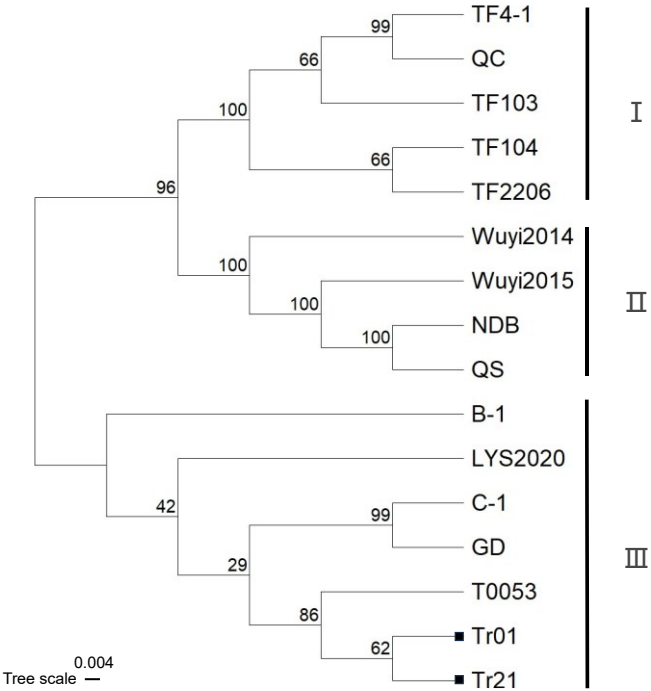

15

16      Supplementary Figure 1. Neighbor-Joining phylogenetic tree of 16 *T. fuciformis* strains based on ITS  
17      sequences (bootstrap = 1000 replicates). Strains are color-coded by origin: ■ cultivated (n=2), other  
18      branches represent wild isolates (n=14).

19

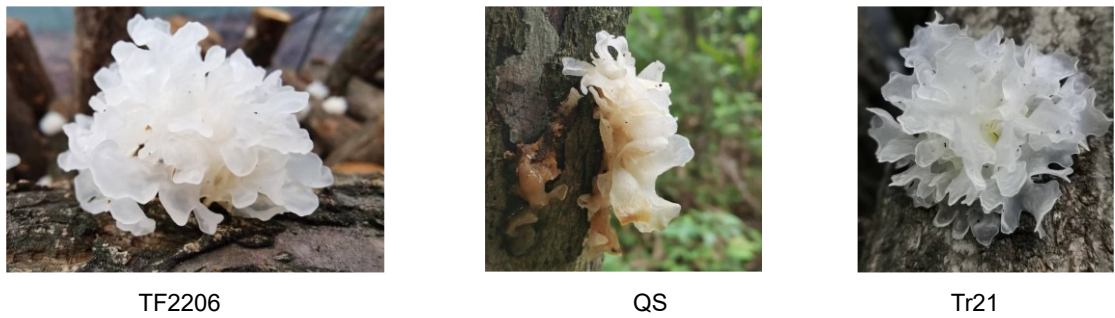

Supplementary Figure 2. Field-collected fruiting bodies of representative strains from three Clusters of *T. fuciformis*. The images display wild fruiting bodies of typical strains from Cluster I (TF2206), Cluster II (QS), and Cluster III (Tr21), which were selected from the 16 analyzed strains in this study. All specimens were collected from natural habitats in China and photographed under native growth conditions.

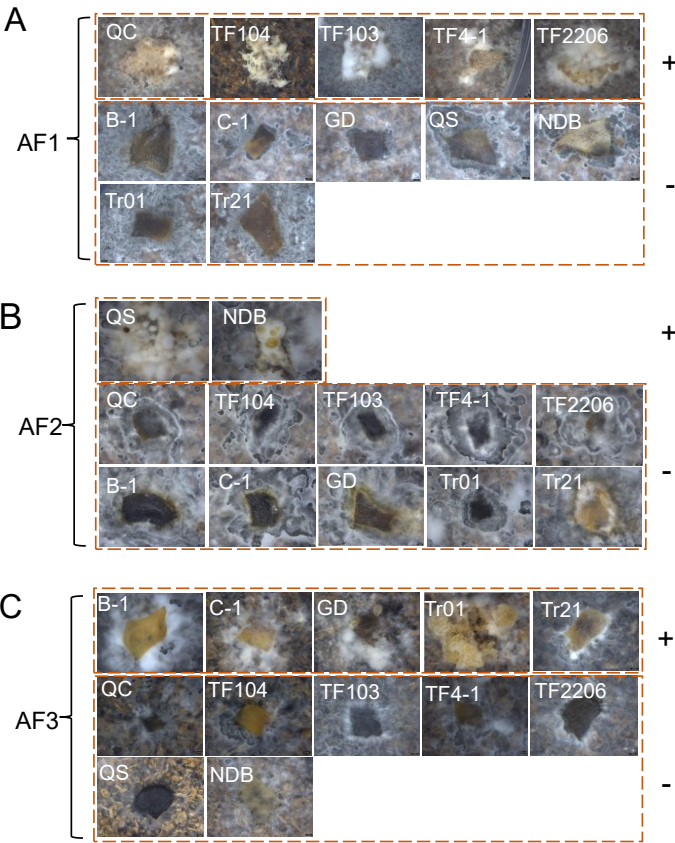

Supplementary Figure 3. Pairing compatibility between *T. fuciformis* strains and their associated fungus (AF) across phylogenetic clusters. (A-C) Representative *T. fuciformis* strains from Cluster I (A), Cluster II (B), and Cluster III (C), showing successful pairing (indicated by "+") with their native AF isolates (e.g., AF1, AF2, AF3), but incompatibility with strains from other clusters.

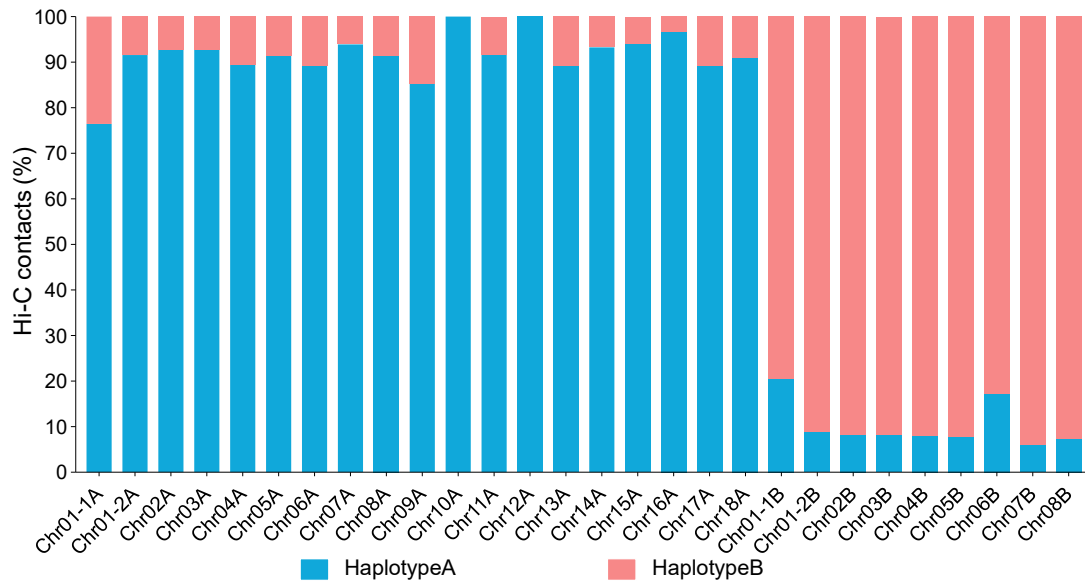

Supplementary Figure 4. NDB Haplotype-resolved Hi-C contact profiles.

Heatmap depicts the distribution of Hi-C contact frequencies (%) between haplotypeA and haplotypeB across 18 chromosomes (Chr01-Chr18). The x-axis indicates chromosome numbers (suffix A/B denotes haplotype assignment), while the y-axis represents normalized Hi-C contact frequency (%). Color gradient reflects haplotype-specific interaction intensity, with haplotypeA (blue) and haplotypeB (red) showing distinct interaction partitioning.

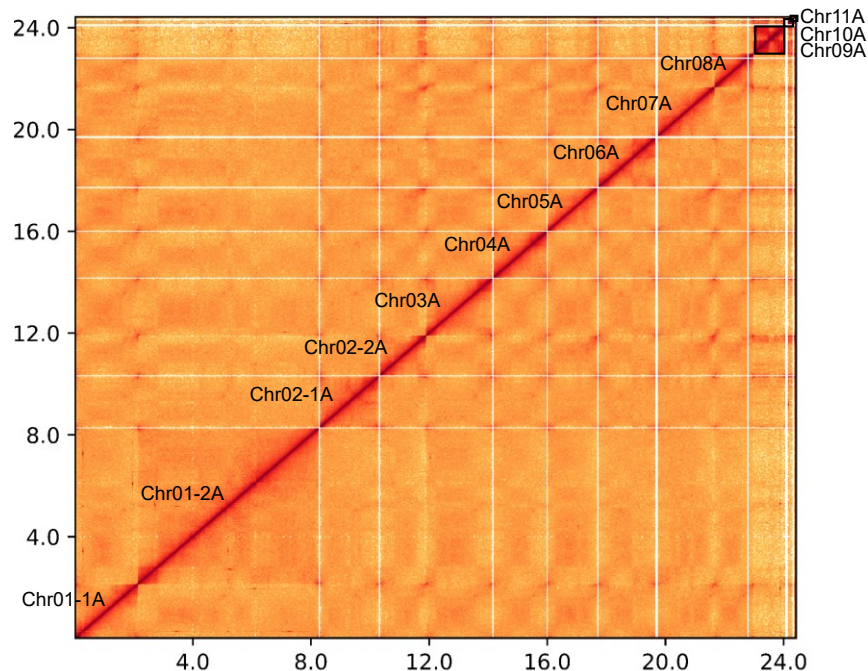

Supplementary Figure 5. Hi-C interaction heatmaps produced by Hi-C Pro validated the assembled genomic architecture of TF2206.

| Tr01   |   | Tr21 |   | B-1 |   | C-1 |   | T0053 | LYS2020 | GD |   | Wuyi 2014 | Wuyi 2015 | QS |   | NDB |   | TF103 |   | TF2206 |   | TF104 | QC | TF4-1 |   |   |   |
|--------|---|------|---|-----|---|-----|---|-------|---------|----|---|-----------|-----------|----|---|-----|---|-------|---|--------|---|-------|----|-------|---|---|---|
| Tr01A  | A | B    | A | B   | A | B   | A | B     | A       | A  | A | B         | A         | A  | A | B   | A | B     | A | B      | A | B     | A  | A     | B | A | B |
| Chr01A | + | +    | + | +   | + | +   | + | +     | +       | +  | + | +         | +         | +  | + | +   | + | +     | + | +      | + | +     | +  | +     | + | + | + |
| Chr02A | + | +    | + | +   | + | +   | + | +     | +       | +  | + | +         | +         | +  | + | +   | + | +     | + | +      | + | +     | +  | +     | + | + | + |
| Chr03A | + | +    | + | +   | + | +   | + | +     | +       | +  | + | +         | +         | +  | + | +   | + | +     | + | +      | + | +     | +  | +     | + | + | + |
| Chr04A | + | +    | + | +   | + | +   | + | +     | +       | +  | + | +         | +         | +  | + | +   | + | +     | + | +      | + | +     | +  | +     | + | + | + |
| Chr05A | + | +    | + | +   | + | +   | + | +     | +       | +  | + | +         | +         | +  | + | +   | + | +     | + | +      | + | +     | +  | +     | + | + | + |
| Chr06A | + | +    | + | +   | + | +   | + | +     | +       | +  | + | +         | +         | +  | + | +   | + | +     | + | +      | + | +     | +  | +     | + | + | + |
| Chr07A | + | +    | + | +   | + | +   | + | +     | +       | +  | + | +         | +         | +  | + | +   | + | +     | + | +      | + | +     | +  | +     | + | + | + |
| Chr08A | + | +    | + | +   | + | +   | + | +     | +       | +  | + | +         | +         | +  | + | +   | + | +     | + | +      | + | +     | +  | +     | + | + | + |
| Chr09A | + | +    | + | +   | + | +   | + | +     | +       | +  | - | -         | -         | -  | - | -   | - | -     | - | -      | - | -     | -  | -     | - | - | - |
| Chr10A | + | +    | + | +   | + | +   | + | +     | -       | +  | + | -         | -         | -  | - | -   | - | -     | - | -      | - | -     | -  | -     | - | - | - |
| Chr11A | + | +    | + | +   | - | -   | - | -     | +       | +  | + | +         | +         | +  | + | +   | + | +     | - | -      | - | -     | -  | -     | - | - | - |

48

49

50

51

52

53

54

Supplementary Figure 6. Synteny analysis of chromosomes between the Tr01 hapA genome and 26 haploid genomes. the "+" symbol on a blue background indicates synteny between the Tr01 hapA chromosome and chromosomes in other haploid genomes, while the "-" symbol on a yellow background indicates the absence of synteny between the Tr01 hapA chromosome and chromosomes in other haploid genomes.

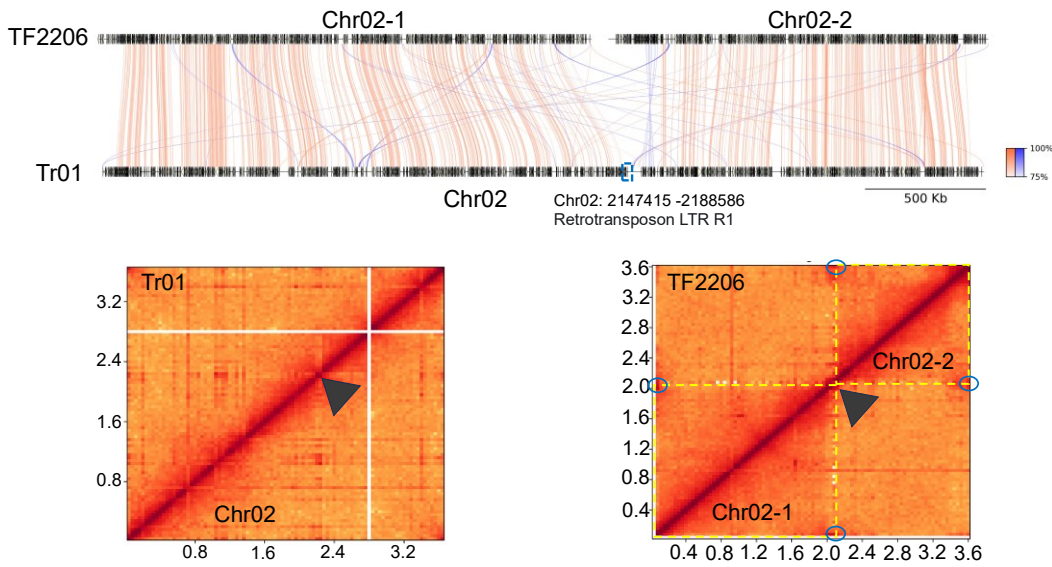

55

56

57

58

59

60

61

62

63

64

65

66

Supplementary Figure 7. Syntenic conservation analysis of Chr02 between Tr01 and TF2206 strains. Blue box delineates syntenic region boundaries. Hi-C contact heatmaps of Chr01 (40-Kb resolution) are shown for Tr01 (left) and TF2206 (right). Black triangles indicate syntenic boundaries, while solid black circles mark telomere interaction hotspots.

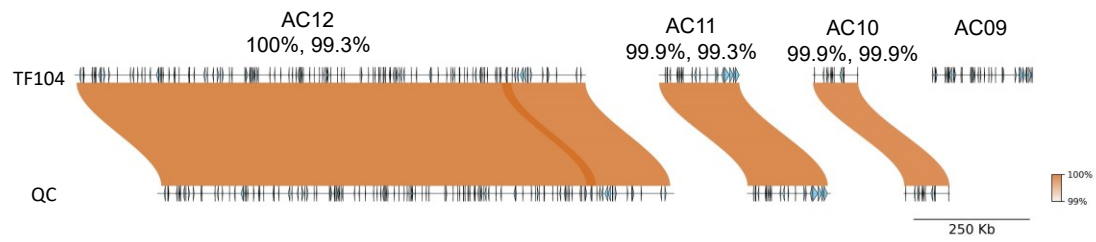

Supplementary Figure 8. Synteny analysis of accessory chromosomes in the QCA and TF104A genomes. The homologous chromosomes AC10 to AC12 show near-identical synteny between the QCA and TF104A genomes, with sequence similarity >99.9% and coverage  $\geq$ 99.3%.
